CORRECTION

# Correction: A Unifying Probabilistic View of Associative Learning

The *PLOS Computational Biology* Staff

There is an error in equation 15, the “discounted time derivative”  $h_t$  is defined incorrectly. It should read as follows:

“Operationally, the only change from the Kalman filter model described above is to replace the stimulus features  $x_t$  with their discounted time derivative,  $h_t = x_t - \gamma x_{t+1}$ . To see why this makes sense, note that the immediate reward can be expressed in terms of the difference between two values:

$$\begin{aligned} r_t &= V(x_t) - \gamma V(x_{t+1}) \\ &= w_t x_t - \gamma w_t x_{t+1} \\ &= w_t (x_t - \gamma x_{t+1}). \end{aligned} \tag{1}$$

This error does not affect the simulations, which were implemented with the correct definition.

## Reference

1. Gershman SJ (2015) A Unifying Probabilistic View of Associative Learning. *PLoS Comput Biol* 11(11): e1004567. <https://doi.org/10.1371/journal.pcbi.1004567> PMID: 26535896

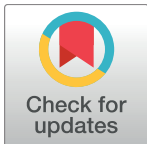

## OPEN ACCESS

**Citation:** The *PLOS Computational Biology* Staff (2017) Correction: A Unifying Probabilistic View of Associative Learning. *PLoS Comput Biol* 13(11): e1005829. <https://doi.org/10.1371/journal.pcbi.1005829>

**Published:** November 16, 2017

**Copyright:** © 2017 The PLOS Computational Biology Staff. This is an open access article distributed under the terms of the [Creative Commons Attribution License](https://creativecommons.org/licenses/by/4.0/), which permits unrestricted use, distribution, and reproduction in any medium, provided the original author and source are credited.
